# Supplementary material for: Histone Variants and Their Post-Translational Modifications in Primary Human Fat Cells
Source: PubMed Central journal article supplement (PMC3017551; doi:10.1371/journal.pone.0015960), 2011-01-07
Supplement: pone.0015960.s006.pdf [file pone.0015960.s006.pdf]

---

**Table S1.** Characteristics of participating subjects.

All subjects were female and nobody was diagnosed with diabetes

---

| <b>Subject</b> | <b>Age (years)</b> | <b>BMI (kg/m<sup>2</sup>)</b> |
|----------------|--------------------|-------------------------------|
| 1              | 50                 | 27.0                          |
| 2              | 68                 | 24.5                          |
| 3              | 76                 | 31.6                          |
| 4              | 35                 | 24.4                          |
| 5              | 68                 | 32.2                          |
| 6              | 72                 | 27.3                          |

---
