# Supplementary material for: Histone Variants and Their Post-Translational Modifications in Primary Human Fat Cells
Source: PubMed Central journal article supplement (PMC3017551; doi:10.1371/journal.pone.0015960), 2011-01-07
Supplement: pone.0015960.s007.pdf [file pone.0015960.s007.pdf]

**Table S2.** Proteins from acid extracted whole cells identified by the LC/MS/MS

| <b>Protein</b>                            | <b>NCBI acc. number</b> | <b>MW (kDa)</b> | <b>pI</b> | <b>location<sup>1</sup></b> | <b>peptide#<sup>2</sup></b> |
|-------------------------------------------|-------------------------|-----------------|-----------|-----------------------------|-----------------------------|
| Adipose specific 2                        | GI:5802976              | 7.9             | 5.2       |                             | 4                           |
| Annexin A1                                | GI:4502101              | 38.7            | 6.6       | Cyt,Nuc                     | 5                           |
| Annexin A2                                | GI:18645167             | 38.6            | 7.6       | End                         | 5                           |
| Calmodulin                                | GI:825635               | 17.2            | 4.1       | Cyt,Nuc                     | 5                           |
| chaperonin 10                             | GI:4008131              | 10.6            | 9.4       | Mt                          | 3                           |
| diazepam binding inhibitor                | GI:10140853             | 11.8            | 5.4       |                             | 3                           |
| dismutase,Cu/Zn superoxide                | GI:4507149              | 15.9            | 5.7       | Cyt                         | 3                           |
| elongation factor 1-alpha                 | GI:62896597             | 39.3            | 9         | Cyt                         | 2                           |
| fatty acid binding protein 4              | GI:4557579              | 14.7            | 6.6       | Cyt,Nuc                     | 2                           |
| fatty acid binding protein 5              | GI:4557581              | 15.2            | 6.6       | Cyt                         | 2                           |
| ferritin, heavy polypeptide 1             | GI:56682959             | 21.2            | 5.3       |                             | 4                           |
| Gamma-synuclein                           | GI:3347842              | 13.3            | 5         | Cyt                         | 8                           |
| Alpha 2 globin                            | GI:4504345              | 15.3            | 8.7       | Rbc                         | 5                           |
| Beta globin                               | GI:71727231             | 16              | 7.9       | Rbc                         | 9                           |
| Histone H1                                | different isof.         | 21              | 11        | Nuc                         | 7                           |
| Histone H2A                               | different isof.         | 14              | 11        | Nuc                         | 10                          |
| Histone H2B                               | different isof.         | 14              | 10.3      | Nuc                         | 12                          |
| Histone H3                                | different isof.         | 15              | 11.3      | Nuc                         | 6                           |
| Histone H4                                | different isof.         | 11              | 11        | Nuc                         | 7                           |
| Perilipin                                 | GI:21410323             | 55.9            | 5.8       | LD                          | 3                           |
| plasma membrane associated protein, S3-12 | GI:122937195            | 134.4           | 8.9       | Mem,Cyt,LD                  | 30                          |
| PTRF                                      | GI:42734430             | 43.5            | 5.5       | Nuc,Mem                     | 5                           |
| ribosomal protein L13                     | GI:15431295             | 24.0            | 11.6      | Rb                          | 2                           |
| ribosomal protein P2                      | GI:4506671              | 12.0            | 4.4       | Rb                          | 3                           |
| S100 calcium binding protein A6           | GI:7657532              | 10.2            | 5.3       | Cyt,NucE                    | 2                           |
| S100 calcium binding protein A10          | GI:4506761              | 11.2            | 6.8       | Mt                          | 4                           |
| S100 calcium binding protein A11          | GI:5032057              | 11.7            | 6.6       | Cyt,Nuc                     | 3                           |
| serum albumin                             | GI:28592                | 69.4            | 6.1       | Sc                          | 12                          |
| tropomyosin 1                             | GI:63252898             | 32.7            | 4.7       | Cyt                         | 2                           |
| tropomyosin 4                             | GI:4507651              | 28.5            | 4.7       | Cyt                         | 7                           |
| Vimentin (desmin)                         | GI:62414289             | 53.7            | 5.1       | Cyt                         | 27                          |

1: as in table 1 2: peptides are identified with both CID and ETD or have a MASCOT score over 45
